# Supplementary material
Source: ML conference proceedings conference paper supplement (https://proceedings.mlr.press/v38/lee15c.html)
Supplement: Supplementary file [file lee15c-supp.pdf]

---

# Supplementary Material for Bayesian Hierarchical Clustering with Exponential Family: Small-Variance Asymptotics and Reducibility

---

Anonymous Author 1  
Unknown Institution 1

Anonymous Author 2  
Unknown Institution 2

## 1 Derivations in Section 3.2

For  $\mathbf{X}_c = \{\mathbf{x}_i\}_{i \in c} \stackrel{\text{iid}}{\sim} p(\mathbf{x}|\beta, \boldsymbol{\theta})$ , we have

$$p(\bar{\mathbf{t}}_c|\beta, \boldsymbol{\theta}) = \exp \left\{ \beta|c| \langle \bar{\mathbf{t}}_c, \boldsymbol{\theta} \rangle - \beta|c| \psi(\boldsymbol{\theta}) - \sum_{i \in c} h_\beta(\mathbf{x}_i) \right\}. \quad (1)$$

For notational simplicity, we let  $\bar{\mathbf{t}}_c = \mathbf{y}$  from now. By the normalization property,

$$\beta|c| \psi(\boldsymbol{\theta}) = \log \int \exp \left\{ \beta|c| \langle \mathbf{y}, \boldsymbol{\theta} \rangle - \sum_{i \in c} h_\beta(\mathbf{x}_i) \right\} d\mathbf{y}. \quad (2)$$

Differentiating both sides by  $\boldsymbol{\theta}$  yields

$$\beta|c| \frac{d\psi(\boldsymbol{\theta})}{d\boldsymbol{\theta}} = \int \beta|c| \mathbf{y} \cdot p(\mathbf{y}|\beta, \boldsymbol{\theta}) d\mathbf{y}, \quad \frac{d\psi(\boldsymbol{\theta})}{d\boldsymbol{\theta}} = \mathbb{E}[\mathbf{y}]. \quad (3)$$

Also, we have

$$\begin{aligned} \beta|c| \frac{\partial^2 \psi(\boldsymbol{\theta})}{\partial \theta_j \partial \theta_k} &= \int \beta|c| y_j p(\mathbf{y}|\beta, \boldsymbol{\theta}) \left( \beta|c| y_j - \beta|c| \frac{\partial \psi(\boldsymbol{\theta})}{\partial \theta_k} \right) dy_j \\ &= \beta^2 |c|^2 \mathbb{E}[y_j y_k] - \beta^2 |c|^2 \mathbb{E}[\mathbf{y}]_j \mathbb{E}[\mathbf{y}]_k = \beta^2 |c|^2 \text{cov}(y_j, y_k). \end{aligned} \quad (4)$$

Hence,

$$\frac{1}{\beta|c|} \frac{\partial^2 \psi(\boldsymbol{\theta})}{\partial \theta_j \partial \theta_k} = \text{cov}(y_j, y_k) = \int (y_j - \mathbb{E}[\mathbf{y}]_j)(y_k - \mathbb{E}[\mathbf{y}]_k) p(\mathbf{y}|\beta, \boldsymbol{\theta}) dy_j dy_k. \quad (5)$$

Differentiating this again yields

$$\begin{aligned} \frac{1}{\beta|c|} \frac{\partial^3 \psi(\boldsymbol{\theta})}{\partial \theta_j \partial \theta_k \partial \theta_l} &= \int (y_j - \mathbb{E}[\mathbf{y}]_j)(y_k - \mathbb{E}[\mathbf{y}]_k)(y_l - \mathbb{E}[\mathbf{y}]_l) p(\mathbf{y}|\beta, \boldsymbol{\theta}) dy_j dy_k dy_l \\ &= \mathbb{E}[(y_j - \mathbb{E}[\mathbf{y}]_j)(y_k - \mathbb{E}[\mathbf{y}]_k)(y_l - \mathbb{E}[\mathbf{y}]_l)]. \end{aligned} \quad (6)$$

Unfortunately, this relationship does not continue after the third order; the fourth derivative of  $\psi(\boldsymbol{\theta})$  is not exactly match to the fourth order central moment of  $\mathbf{y}$ . However, one can easily maintain the  $m$ th order central moment by manipulating the  $m$ th order derivative of  $\psi(\boldsymbol{\theta})$ , and  $m$ th order central moment always have the constant term  $(\beta|c|)^{-m}$ .

Equation (40) of the paper is a simple consequence of the equation (6). To prove the equation (41) of the paper, we use the following relationship:

$$\mathbb{E} \left[ \frac{\epsilon_\phi(\bar{\mathbf{x}}_c)}{\Delta_\phi(\bar{\mathbf{x}}_c)} \right] \approx \frac{\mathbb{E}[\epsilon_\phi(\bar{\mathbf{x}}_c)]}{\mathbb{E}[\Delta_\phi(\bar{\mathbf{x}}_c)]} - \frac{\text{cov}(\epsilon_\phi(\bar{\mathbf{x}}_c), \Delta_\phi(\bar{\mathbf{x}}_c))}{\mathbb{E}[\Delta_\phi(\bar{\mathbf{x}}_c)]^2} + \frac{\mathbb{E}[\epsilon_\phi(\bar{\mathbf{x}}_c)] \text{var}[\Delta_\phi(\bar{\mathbf{x}}_c)]}{\mathbb{E}[\Delta_\phi(\bar{\mathbf{x}}_c)]^3}. \quad (7)$$

Now it is easy to show that this equation converges to zero when  $\beta \rightarrow 0$ ; all the expectations and variances can be obtained by differentiating  $\psi(\boldsymbol{\theta})$  for as many times as needed.
